# Supplementary material for: Investigating cone photoreceptor development using patient-derived NRL null retinal organoids
Source: PubMed Central journal article supplement (PMC7035245; doi:10.1038/s42003-020-0808-5), 2020-02-21
Supplement: 42003_2020_808_MOESM2_ESM.pdf [file 42003_2020_808_MOESM2_ESM.pdf]

## Supplementary Figures

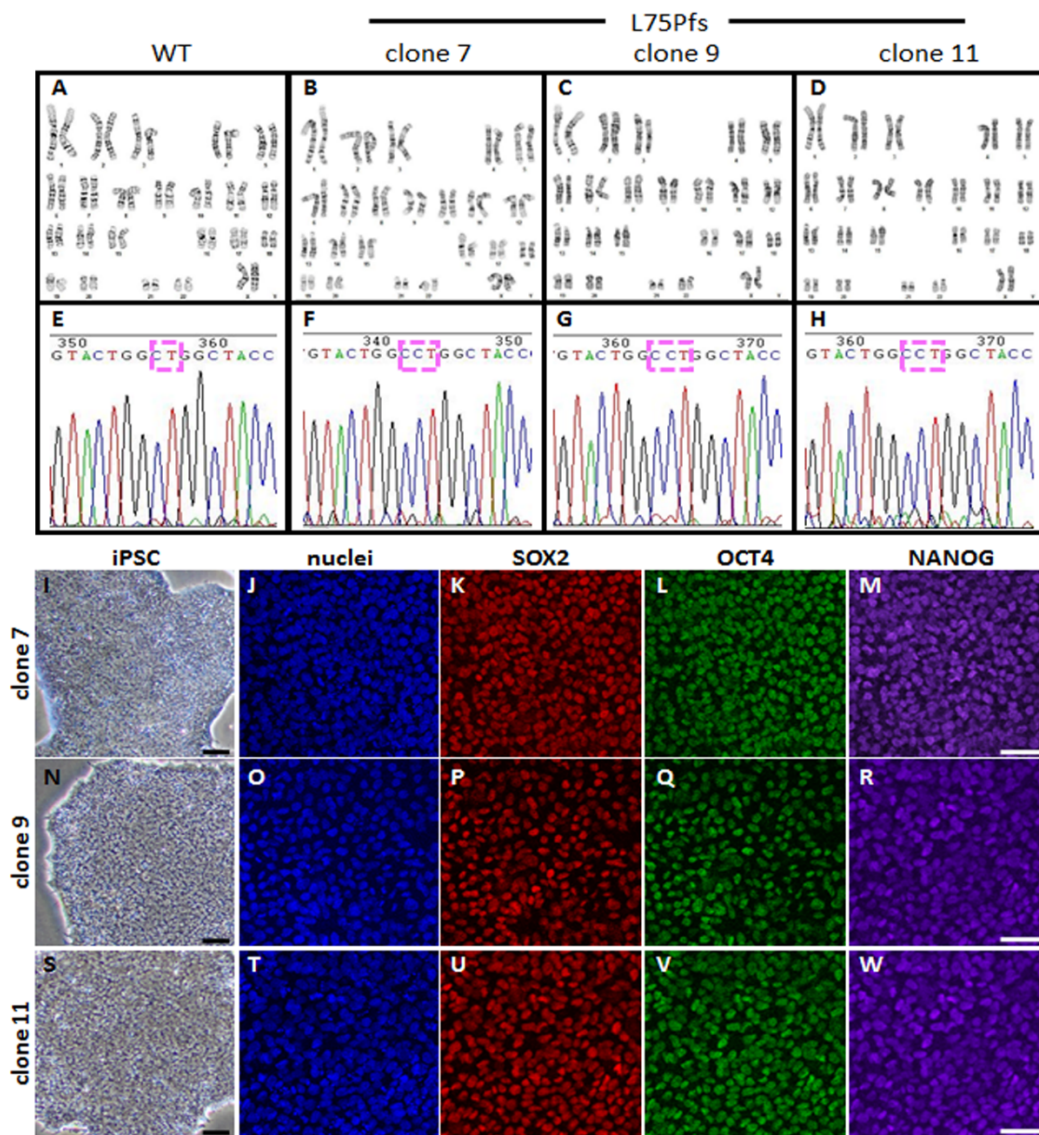

**Supplementary Figure 1. Confirmation of normal karyotypes and the presence or absence of *NRL* mutations in the L75Pfs or WT iPSC lines, respectively. A-D)** Normal karyotypes were confirmed for hPSCs from WT and 3 independent L75Pfs clones. **E-H)** Sequence of PCR amplicon surrounding *NRL* c.223 from WT iPSCs (E) and three L75Pfs clones (F-H) (c.233dupC outlined by dotted pink box). **I-W)** Bright field (I, N, S) and confocal (J-M, O-R, T-W) images of the three L75Pfs iPSC clones confirming the morphology and presence of pluripotency markers. Scale bars = 50 microns.

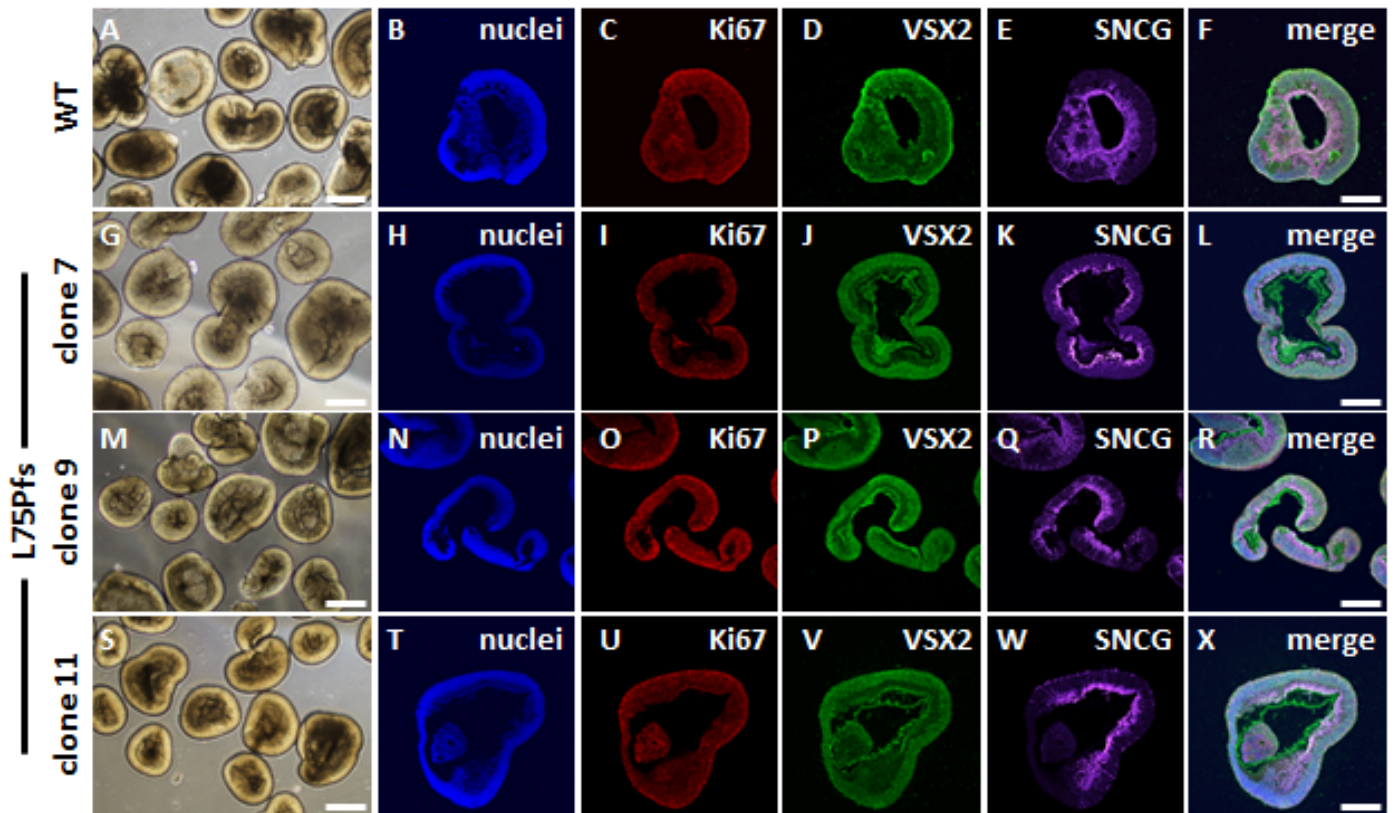

**Supplementary Figure 2. All three L75Pfs hiPSC clones display normal early (stage 1) retinal organoid differentiation.** Bright field and confocal images of stage 1 retinal organoids demonstrating normal bright field morphology (**A, G, M, S**), as well as the expected presence of proliferative Ki67+/VSX2+ (**C, D, I, J, O, P, U, V**) retinal progenitor cells, and SNCG+ (**E, K, Q, W**) retinal ganglion cells from WT (**A-F**) and L75Pfs organoids from 3 independent lines (**G-X**). Scale bars = 250 microns.

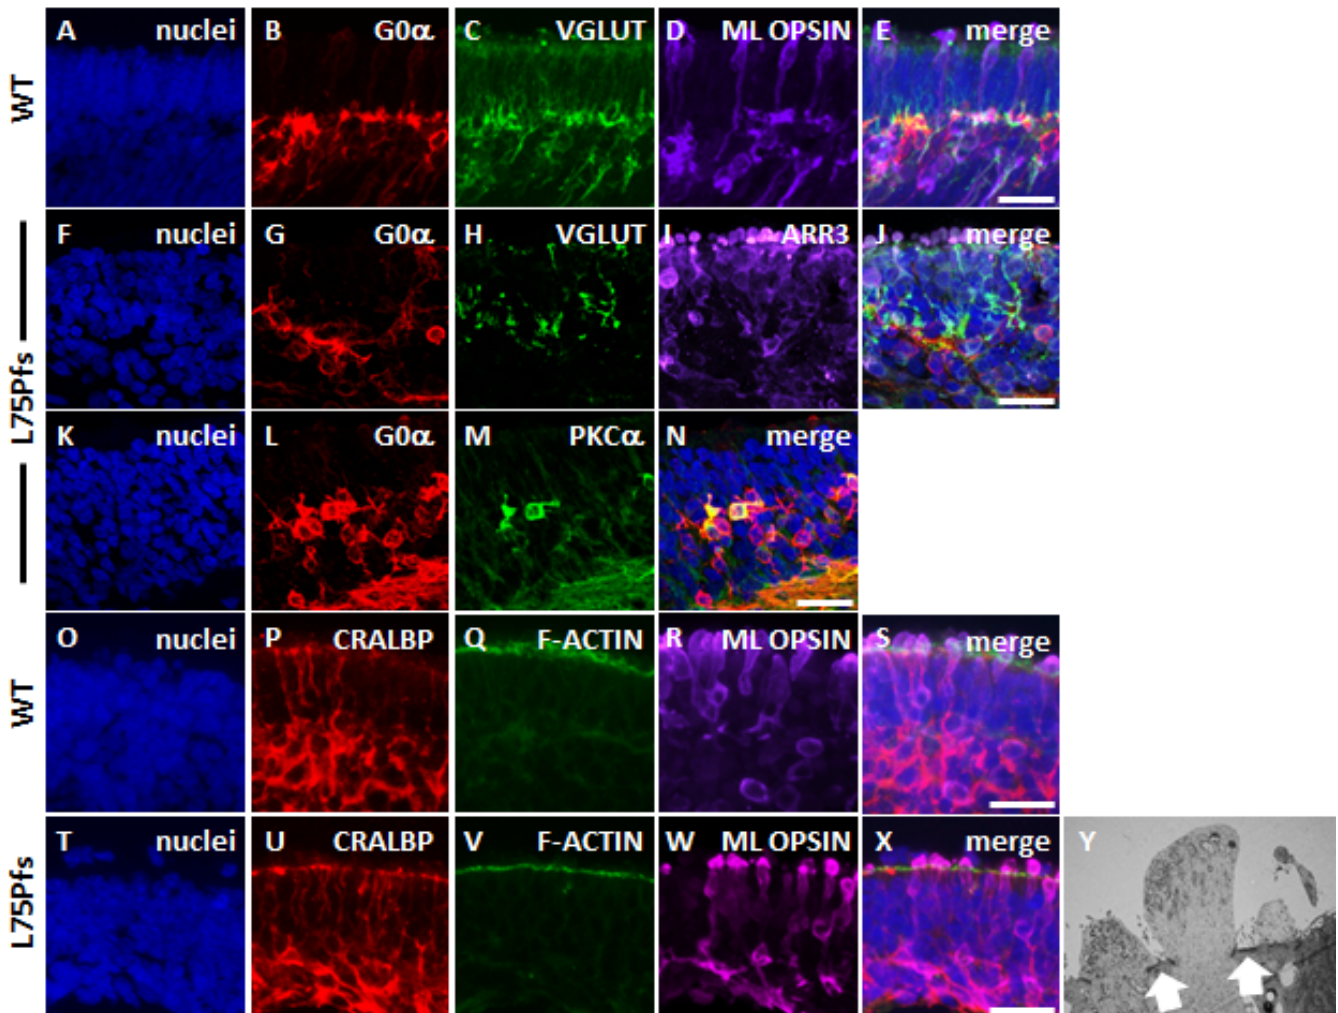

**Supplementary Figure 3. The inner nuclear layer (INL), rod ON bipolar cells, and the outer limiting membrane (OLM) develop normally in L75Pfs retinal organoids. A-J) G0 $\alpha$  ON bipolar cells (B, G) and the presynaptic marker VGLUT (C, H) are detected in the INL and outer plexiform-like region (respectively) of WT (A-E) and L75Pfs (F-J) retinal organoids. K-N) G0 $\alpha$ + / PKC $\alpha$ - rod ON bipolar cells (G, H; merge in I) differentiate along with G0 $\alpha$ + / PKC $\alpha$ - cone ON bipolar cells in L75Pfs organoids despite the absence of NRL+ rods. O-X) F-actin (Q, V) and CRALBP+ Müller glia (P, U) form an intact OLM in WT (O-S) and L75Pfs (T-X) retinal organoids (also visualized in L75Pfs by TEM in panel Y). Scale bars A-N = 25 microns; Y = 2 microns.**

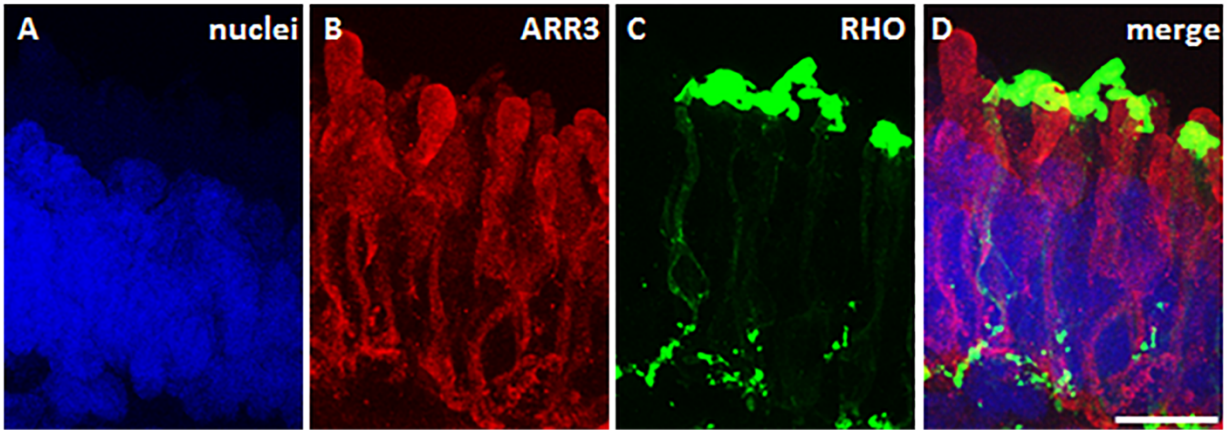

**Supplementary Figure 4.** Confocal images of ARR3 positive cones (B) and RHO positive rods (C, merge in D; DAPI-stained nuclei are shown in A) in a WT d240 stage 3 organoid for comparison to RHO protein expression seen in L75Pfs photoreceptors transduced with lenti-pgkNRL in Figure 3U-X. Scale bar = 25 microns.

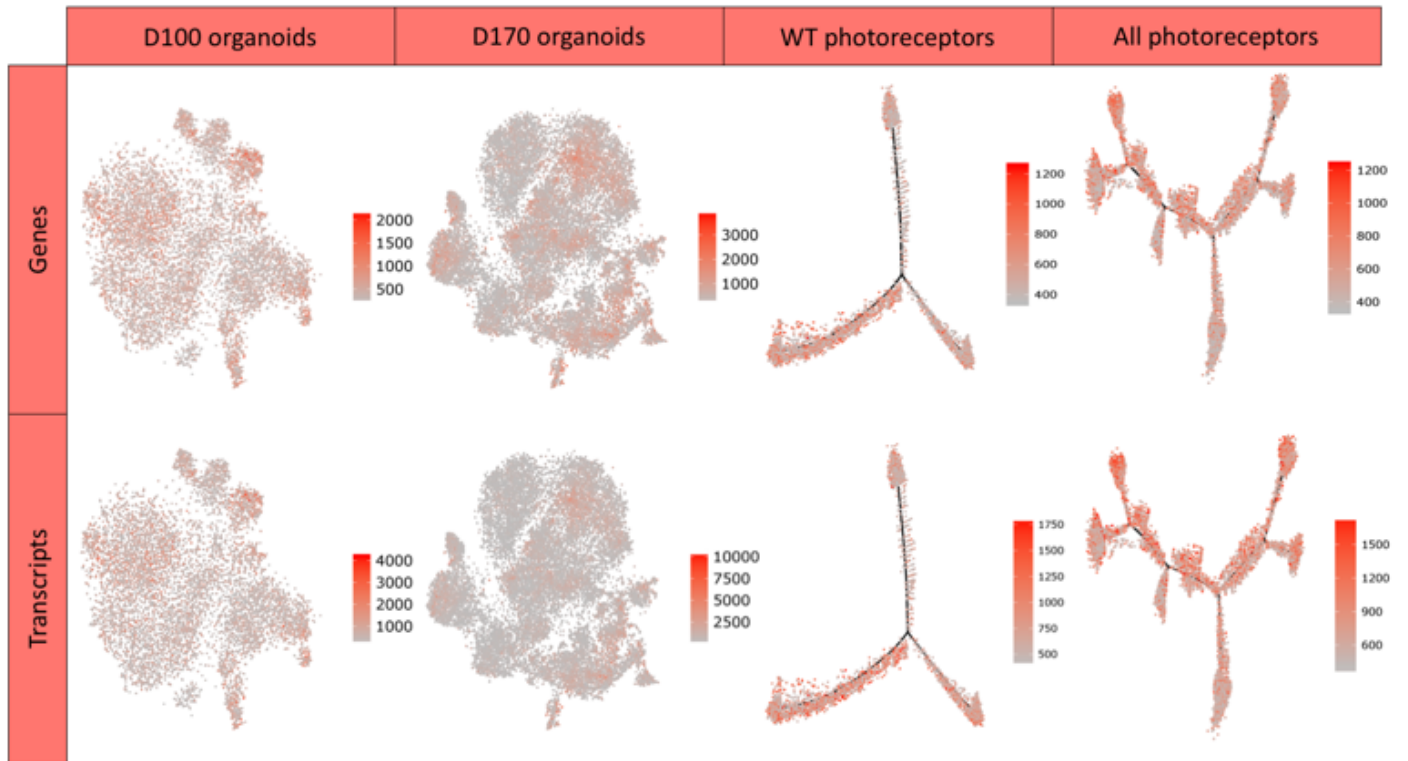

**Supplementary Figure 5: UMIs and transcript number per cells mapped onto tSNE plots and pseudotime trajectories.**

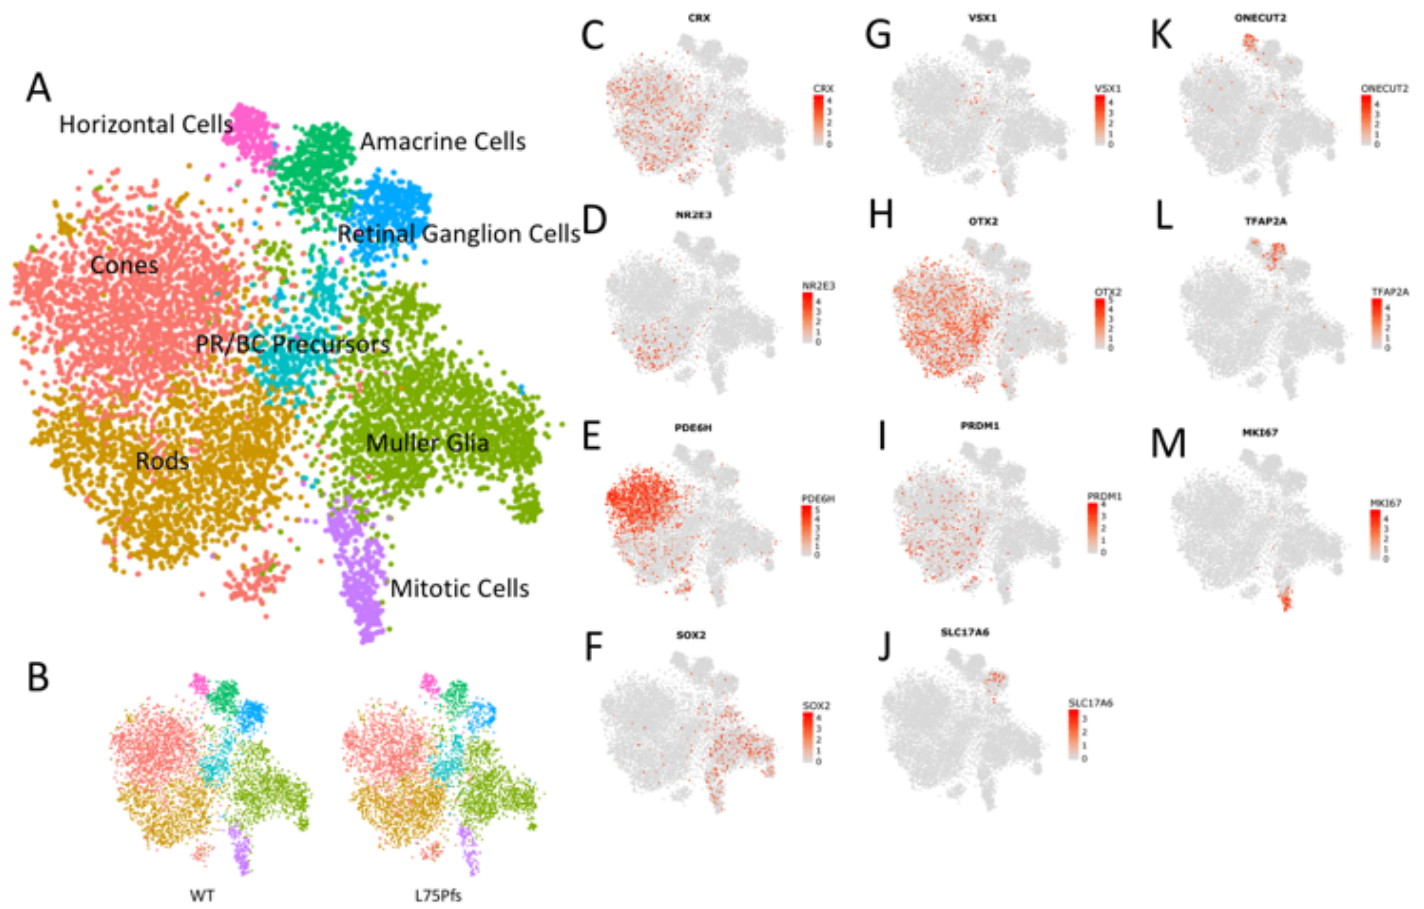

**Supplementary Figure 6: Identification of d100 organoid cell populations by marker gene expression.**

**A)** tSNE plot showing cell populations present in all d100 organoids. **B)** tSNE plot from panel A showing only WT cells (left) or L75Pfs cells (right). **C-M)** Expression pattern of marker genes used to assign cluster identity.

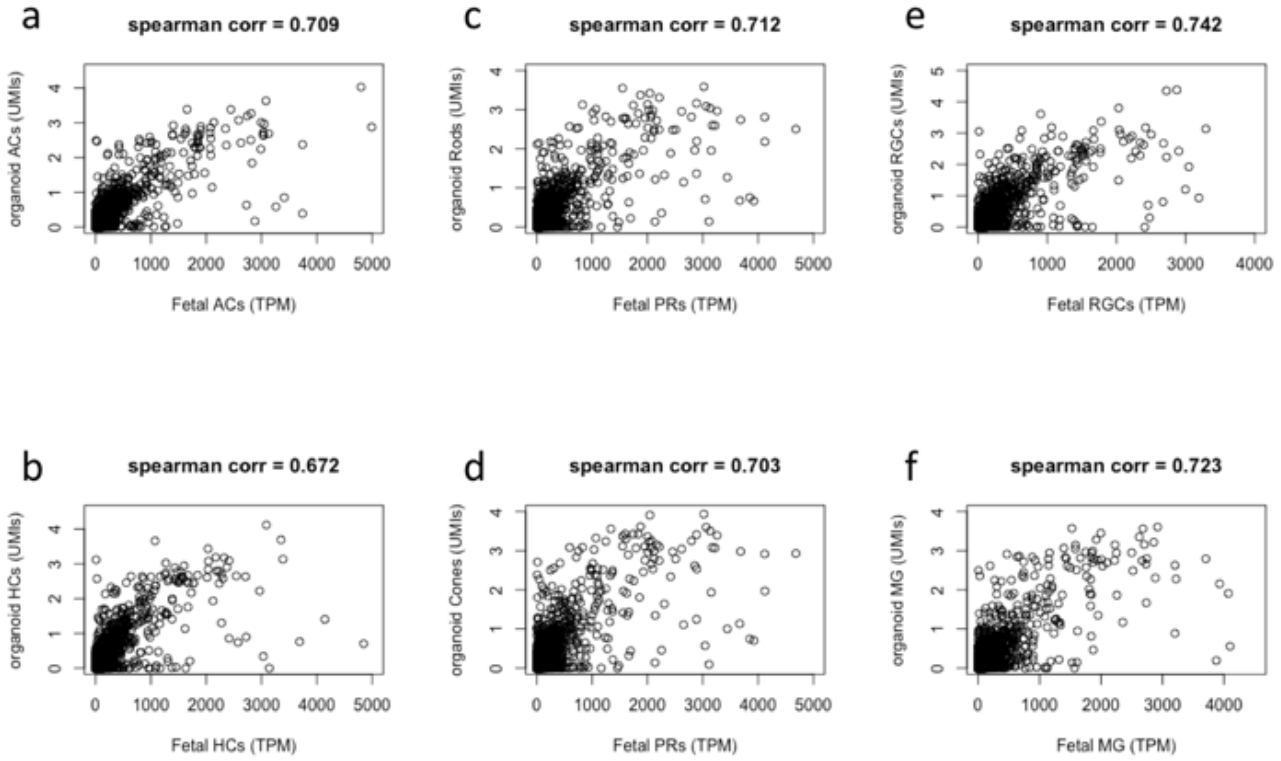

**Supplementary Figure 7: Correlation of d100 retinal cell populations with fetal retina scRNAseq**

**data**<sup>23</sup>. **A-F)** Scatter plots and spearman correlations of amacrine cells (**A**), horizontal cells (**B**), rods (**C**), cones (**D**), retinal ganglion cells (**E**), and Müller glia (**F**).

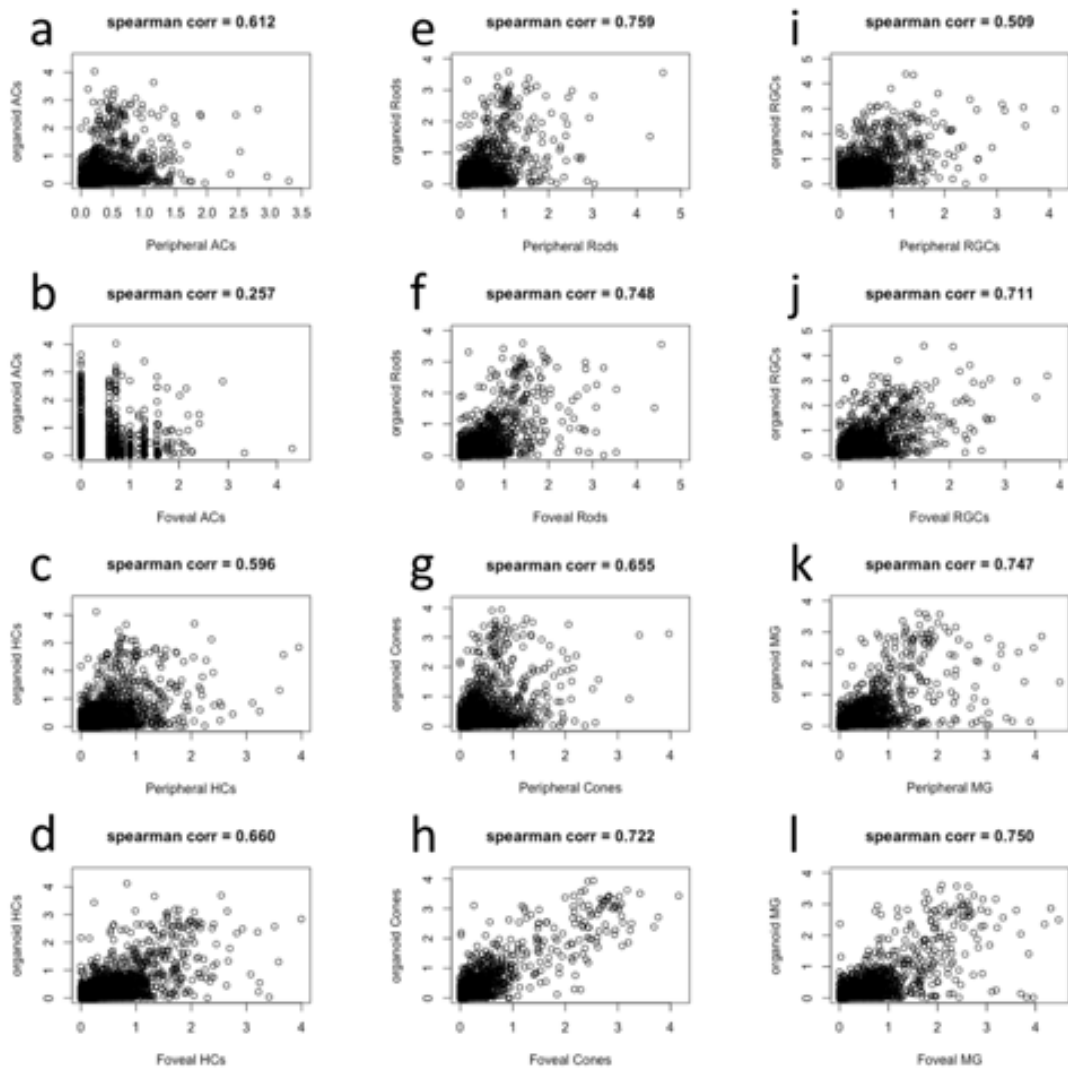

**Supplementary Figure 8: Correlation of d100 retinal cell populations with adult peripheral and foveal retina scRNAseq data<sup>24</sup>.** A-L) Scatter plots and spearman correlations with peripheral (A) and foveal (B) amacrine cells, peripheral (C) and foveal (D) horizontal cells, peripheral (E) and foveal (F) rods, peripheral (G) and foveal (H) cones, peripheral (I) and foveal (J) retinal ganglion cells, and peripheral (K) and foveal Müller glia (L).



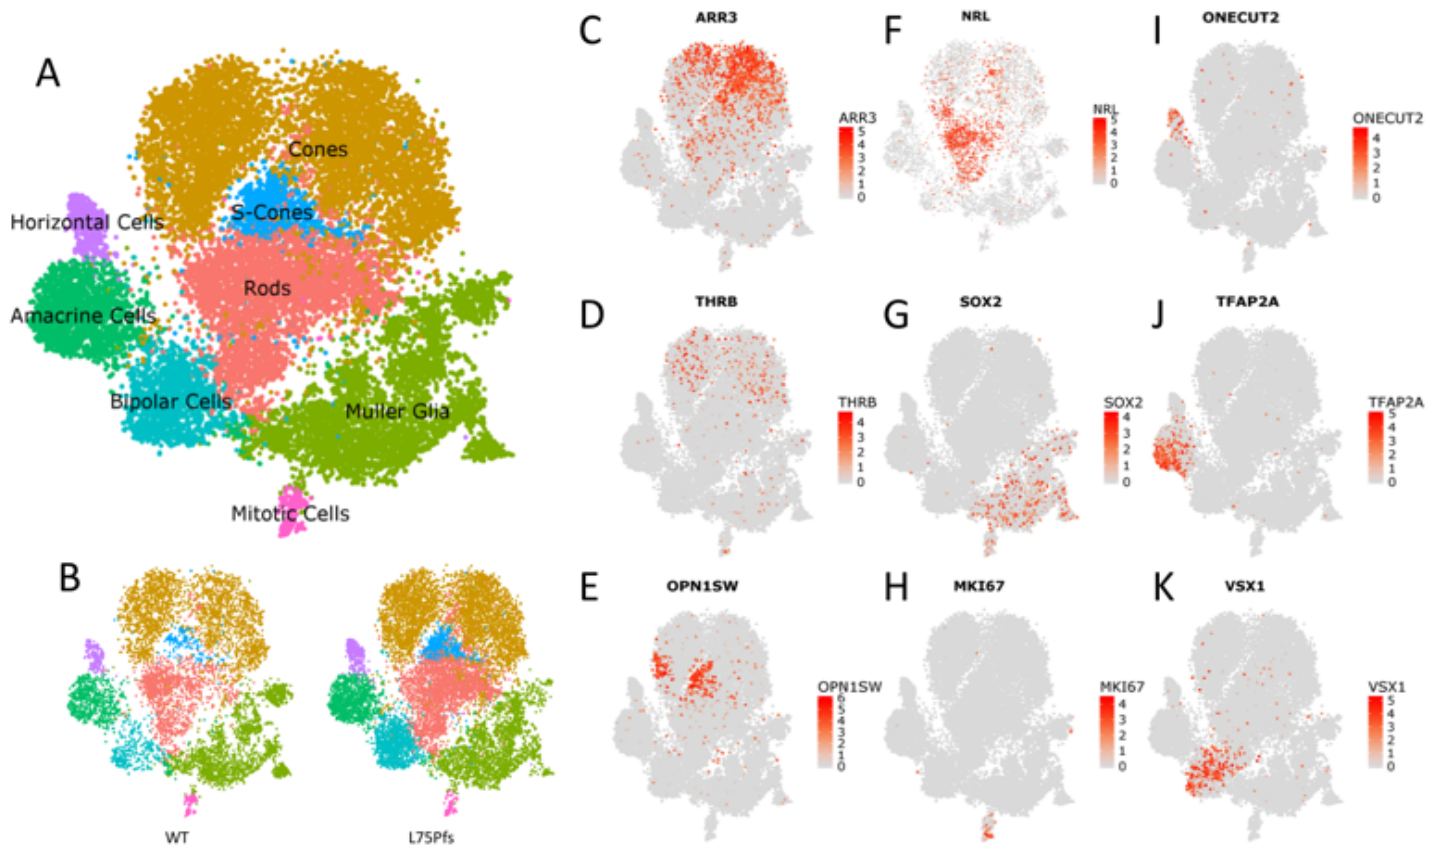

**Supplementary Figure 9: Identification of d170 organoid cell populations by marker gene expression.**

**A)** tSNE plot showing cell populations present in all day 170 organoids. **B)** tSNE plot from panel A showing only WT cells (left) or L75Pfs cells (right). **C-K)** Expression patterns of marker genes used to assign cluster identity. For *NRL* expression (**F**), only WT cells are shown.

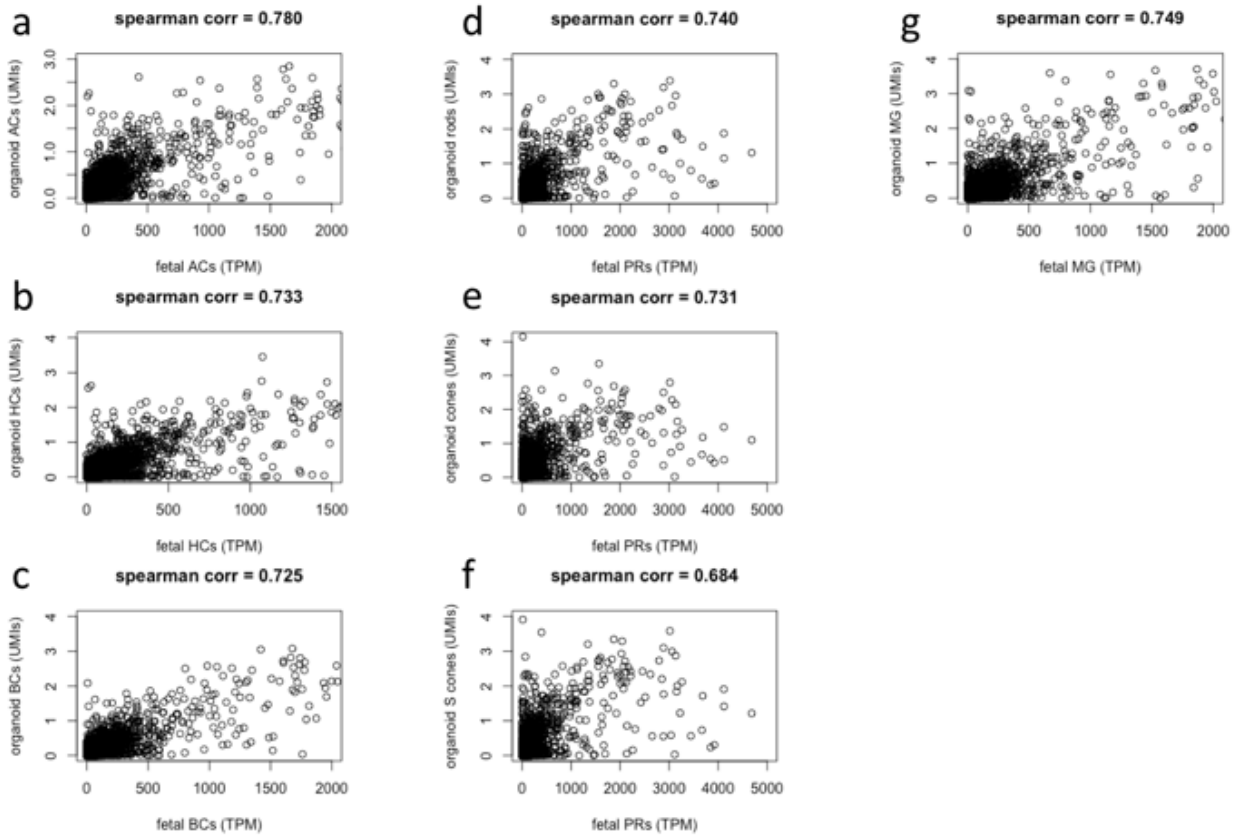

**Supplementary Figure 10: Correlation of d170 retinal cell populations with fetal retina scRNAseq data<sup>23</sup>. A-G) Scatter plots and Spearman correlations of amacrine cells (A), horizontal cells (B), bipolar cells (C), rods (D), cones (E), S cones (F), and Müller glia (G).**

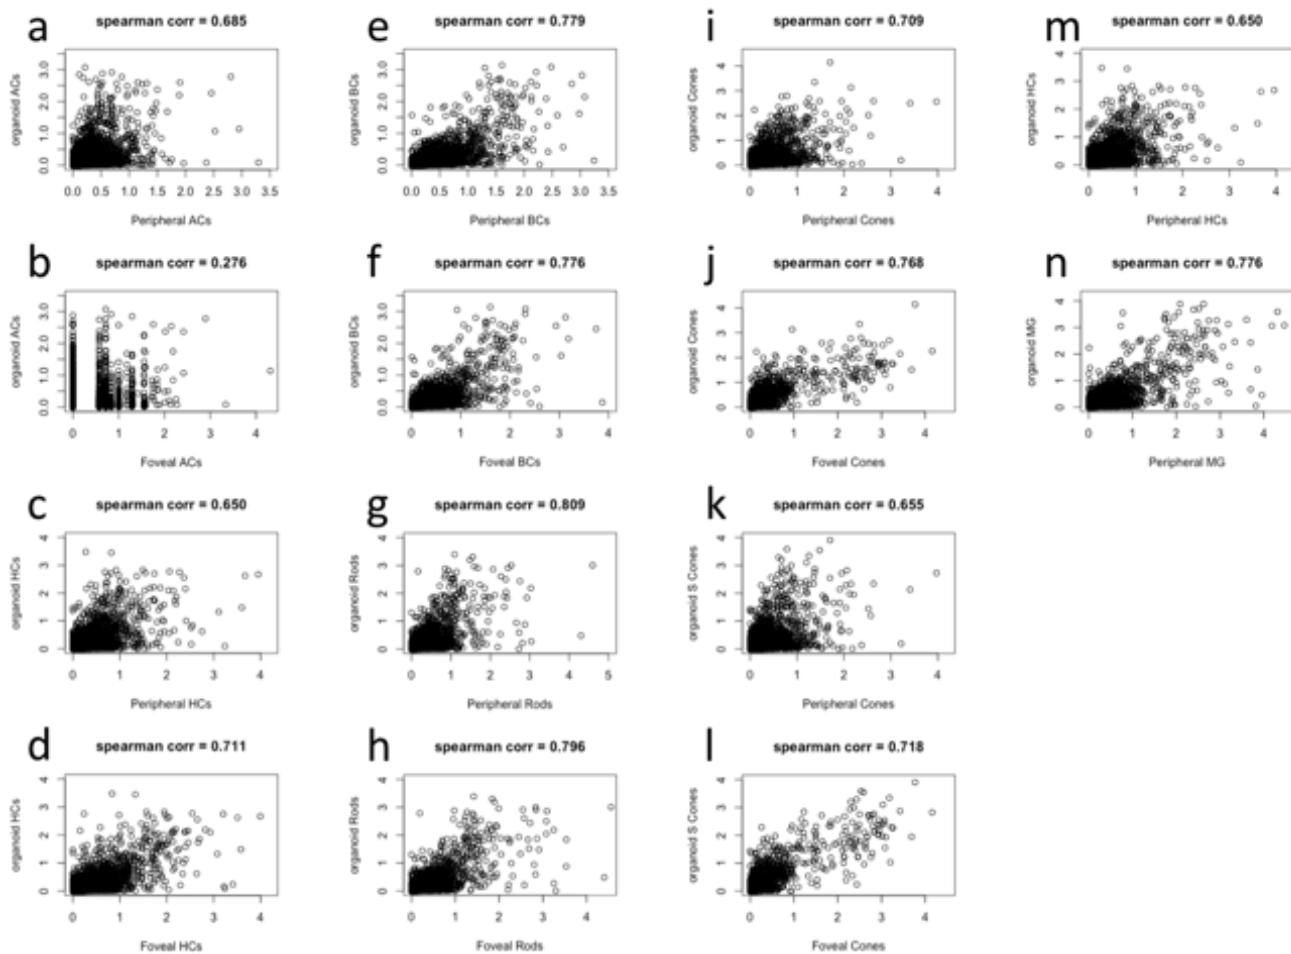

**Supplementary Figure 11: Correlation of d170 retinal cell populations with adult peripheral and**

**foveal retina scRNAseq data**<sup>24</sup>. **A-N)** Scatter plots and Spearman correlations with peripheral **(A)** and foveal **(B)** amacrine cells, peripheral **(C)** and foveal **(D)** horizontal cells, peripheral **(E)** and foveal **(F)** bipolar cells, peripheral **(G)** and foveal **(H)** rods, peripheral **(I)** and foveal **(J)** cones, S-cones with peripheral **(K)** and foveal **(L)** cones, and peripheral **(M)** and foveal Müller glia **(N)**.

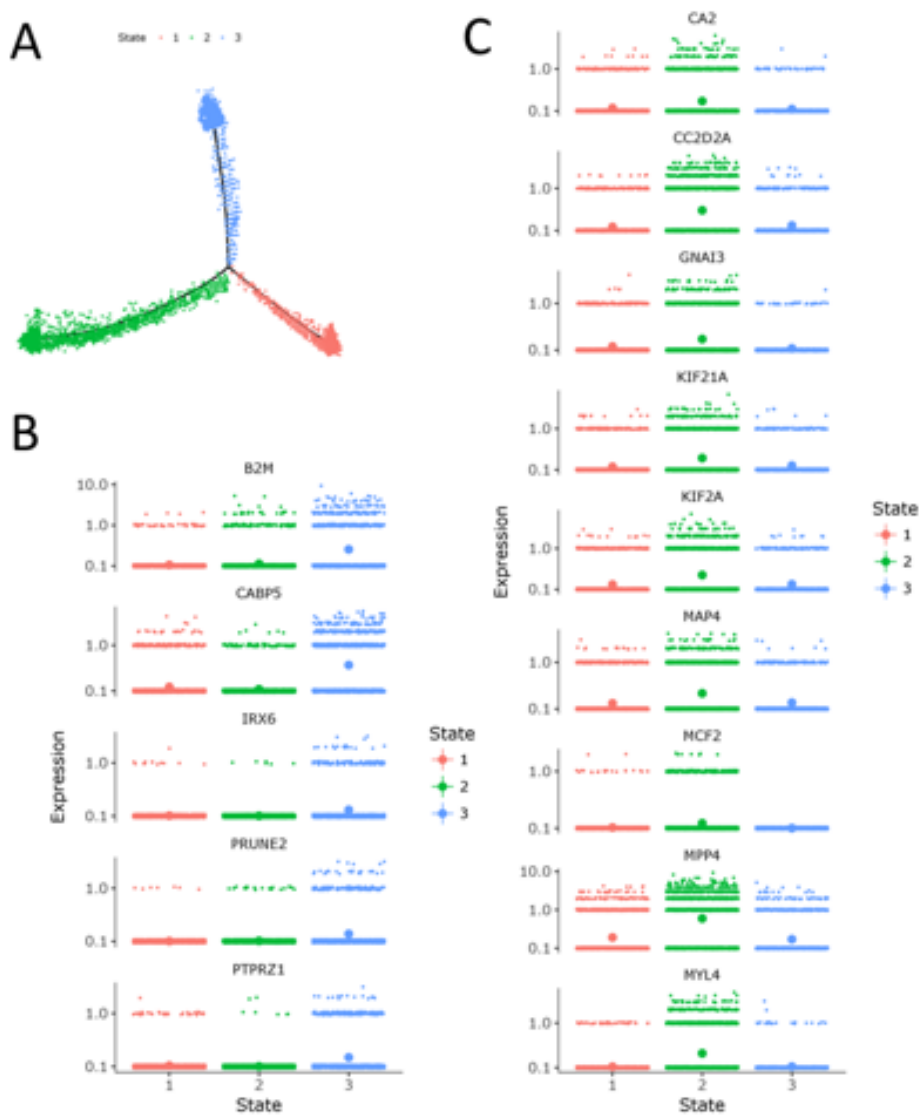

**Supplementary Figure 12: Identification of novel rod- and cone-enriched genes from differential gene expression analysis at the node separating rods and cones. A)** Trajectory of 5144 WT photoreceptors colored by state (state 2 = cones, state 3 = rods). **B-C)** Expression pattern of novel rod-enriched (**B**) and cone-enriched (**C**) genes, with the largest dot indicating average level of expression of each gene of interest.

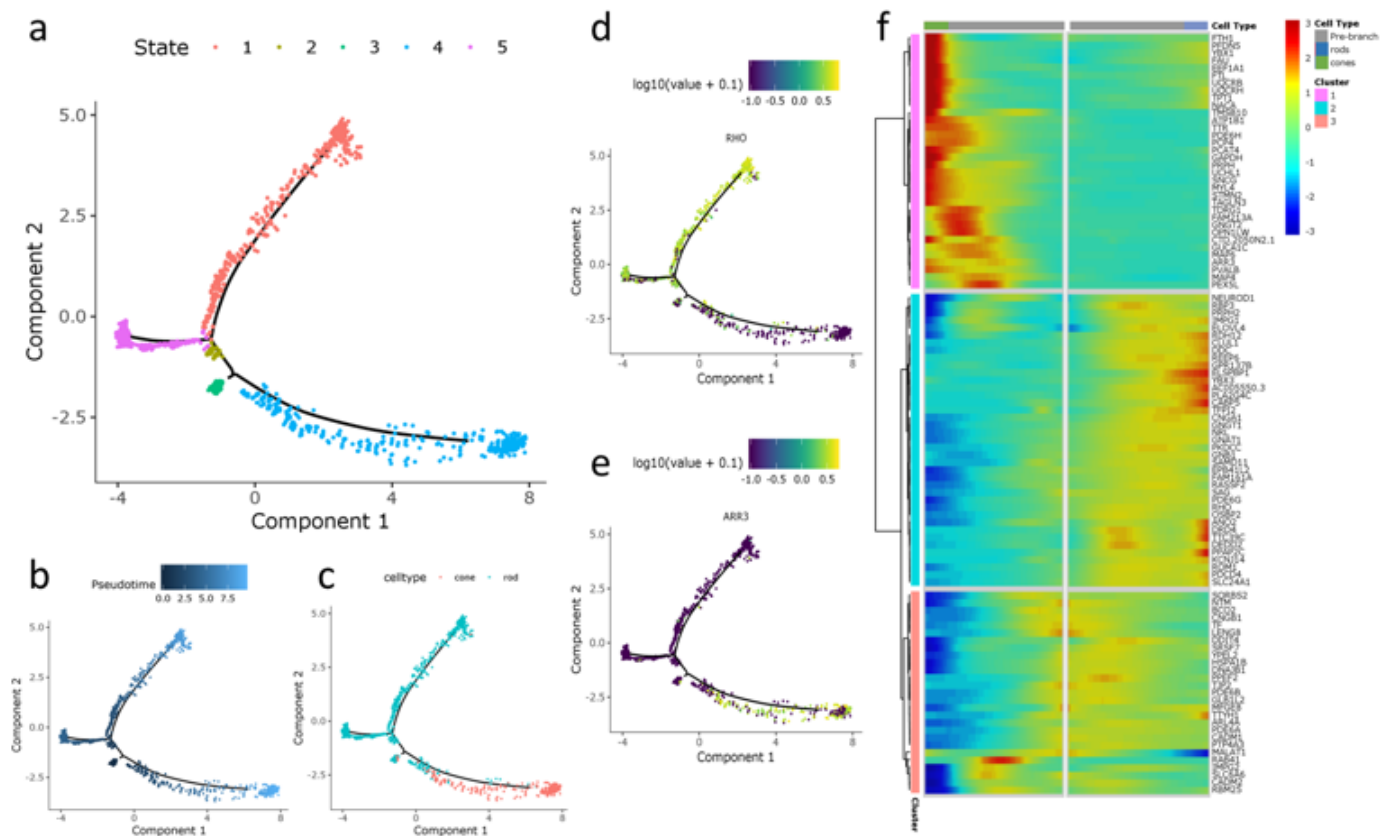

**Supplementary Figure 13: Developmental trajectory of adult *in vivo* photoreceptors<sup>24</sup>. A-C)**

Trajectory colored by state (A), pseudotime (B), and cell type (C). D-E) Expression patterns of RHO (D) and ARR3 (E) along the trajectory. F) Heatmap of the top 100 non-ribosomal differentially expressed genes between states 1 (rods) and 4 (cones).

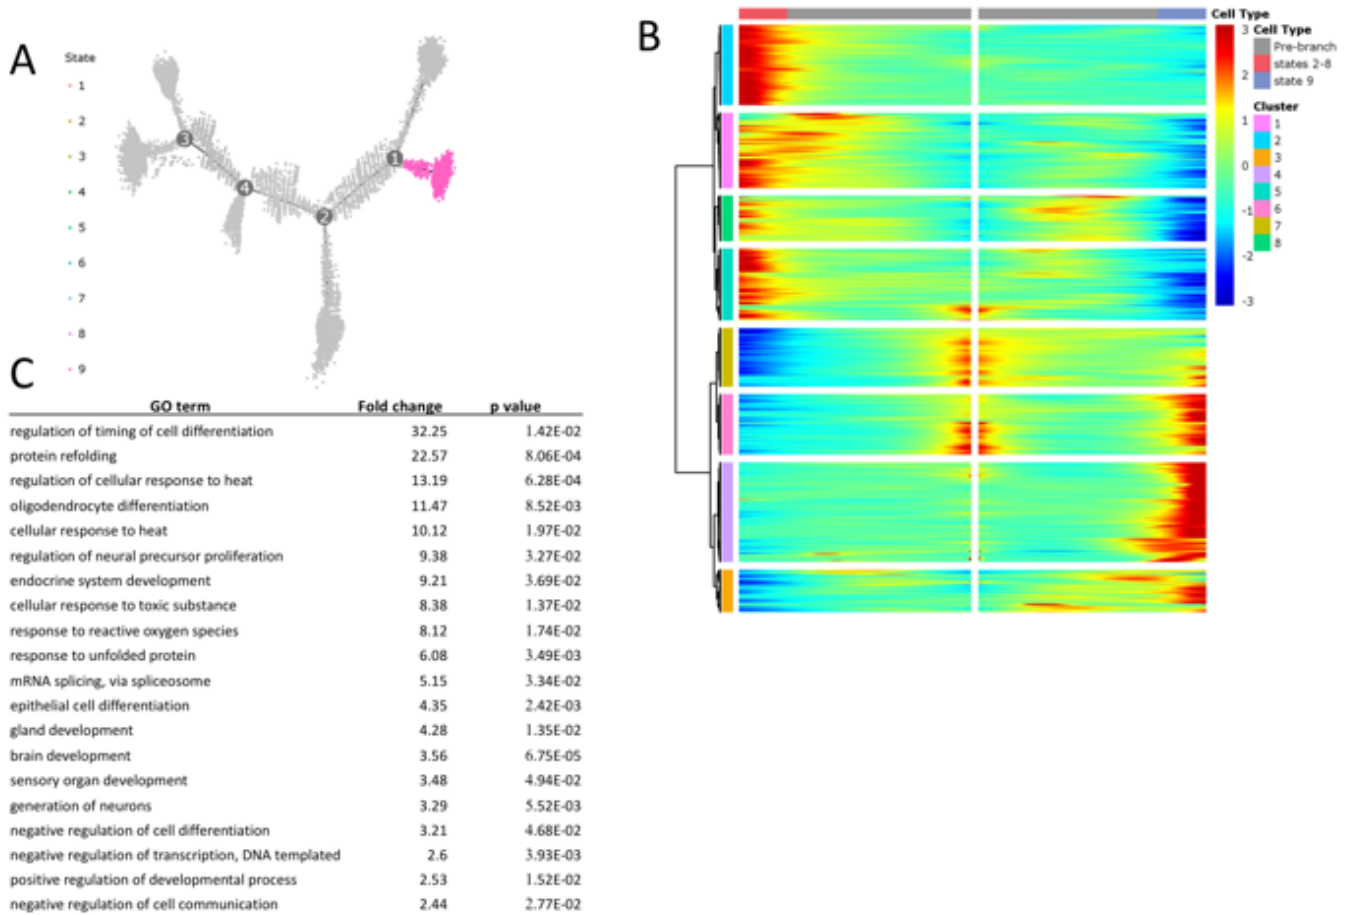

**Supplementary Figure 14: Gene ontology enrichment analysis used to characterize the photoreceptors of state 9. A)** Trajectory of combined WT and L75Pfs cells highlighting state 9 in pink. **B)** Heatmap of all genes differentially expressed at node 1, with genes hierarchically clustered. Clusters 3, 4, and 6 are highly enriched in state 9. **C)** GO term enrichment for genes in clusters 3, 4, and 6 (p values are Bonferroni corrected).

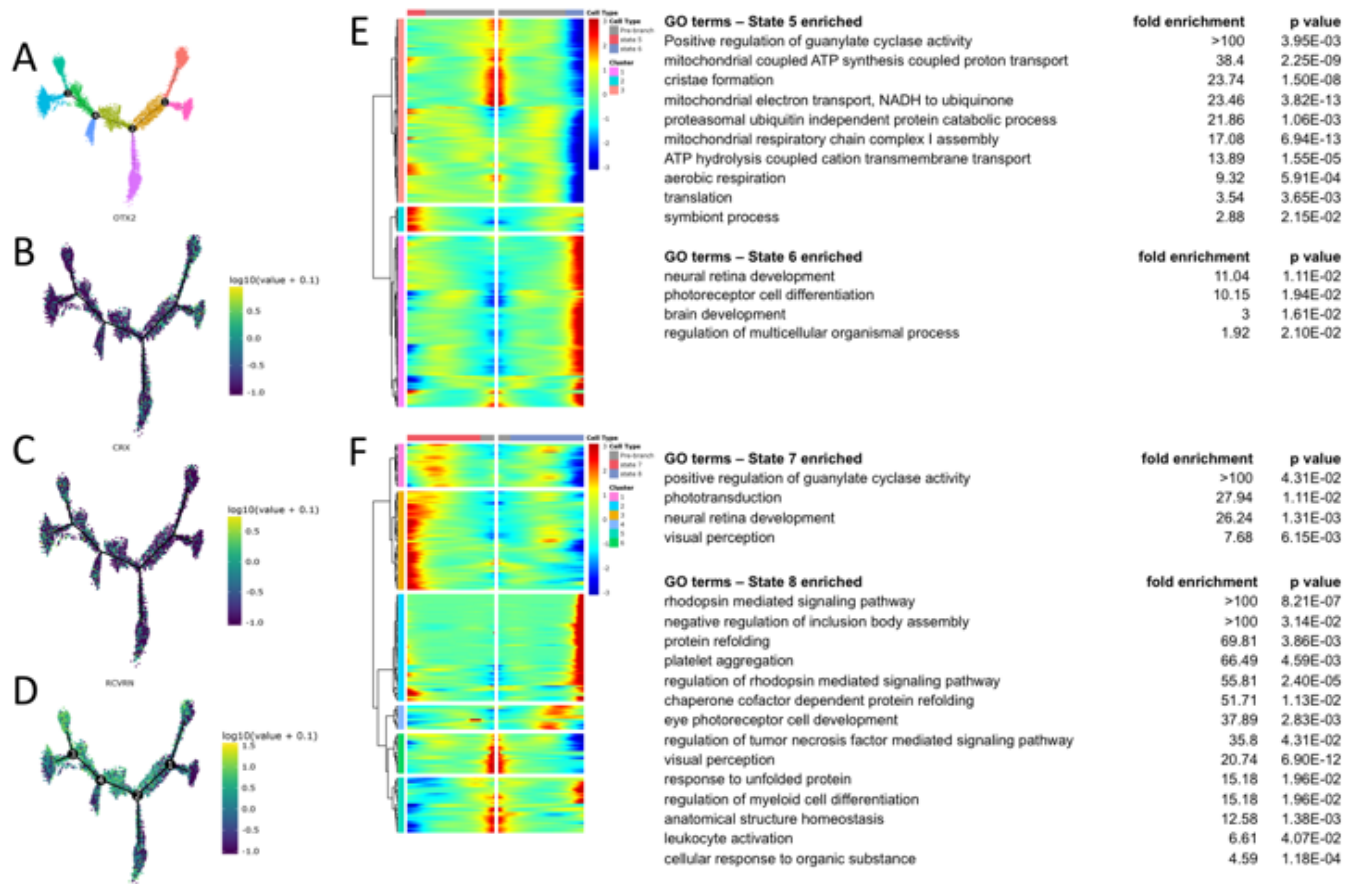

**Supplementary Figure 15: Gene expression and GO enrichment analyses used to identify developing photoreceptors and to characterize differences between the 2 cone states and the 2 rod states. A)** Trajectory of combined WT and L75Pfs photoreceptors colored by state. **B-D)** Expression pattern of *OTX2* (**B**), *CRX* (**C**), and *RCVRN* (**D**) along the trajectory. **E)** Heatmap of genes differentially expressed between cone states 5 and 6 and their corresponding gene ontology enrichment based on gene clusters (gene cluster 1 is enriched in state 6; gene clusters 2 and 3 are enriched in state 5). **F)** Heatmap of genes differentially expressed between rod states 7 and 8 and their corresponding gene ontology enrichment based on gene clusters (gene clusters 1, 3, and 6 are enriched in state 7; gene clusters 2, 4, and 5 are enriched in state 8).

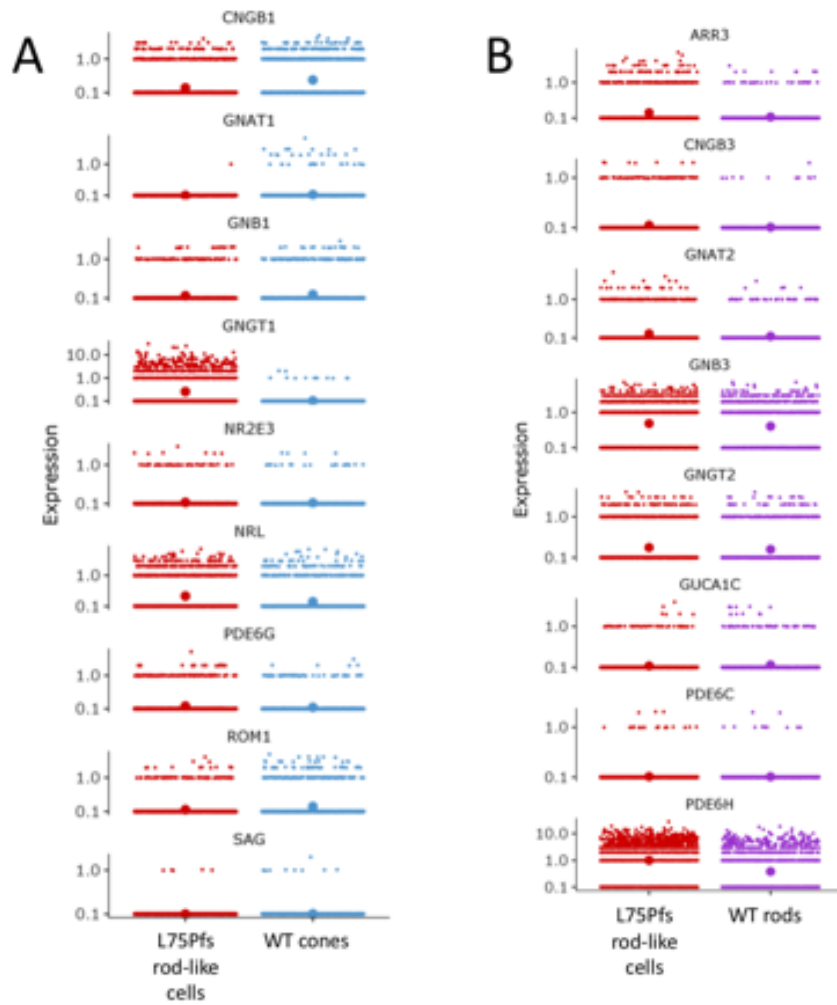

**Supplementary Figure 16: Comparison of rod and cone genes in L75Pfs rod-like cells reveals low expression levels of rod or cone genes. A)** Expression levels of rod genes in L75Pfs rod-like cells is comparable to WT cone expression levels of rod genes. **B)** Expression levels of most cone genes in L75Pfs rod-like cells is comparable to WT rod expression levels of cone genes. Exceptions include *ARR3* and *PDE6H*.



### d160 hiPSC-derived retinal organoids

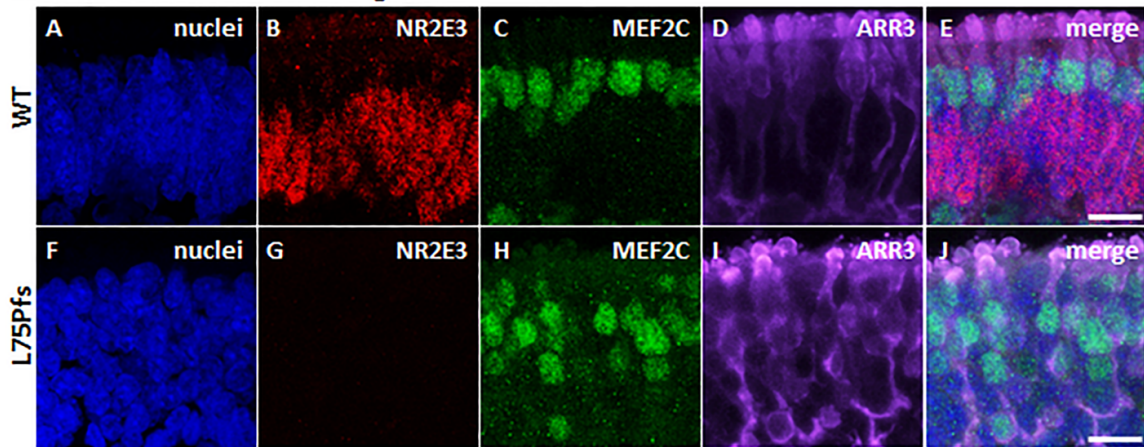

### d122 human fetal retina

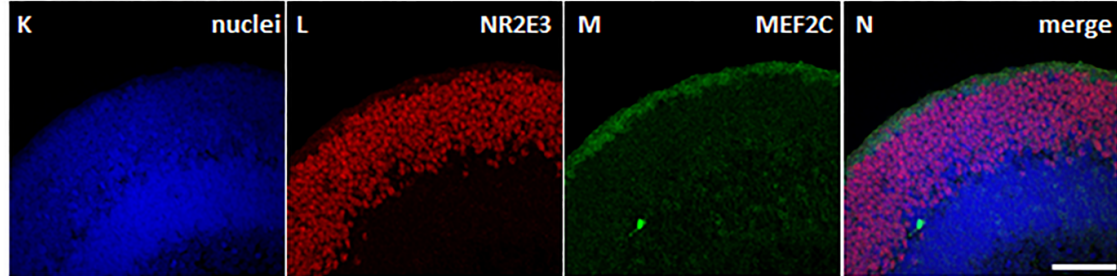

### adult monkey

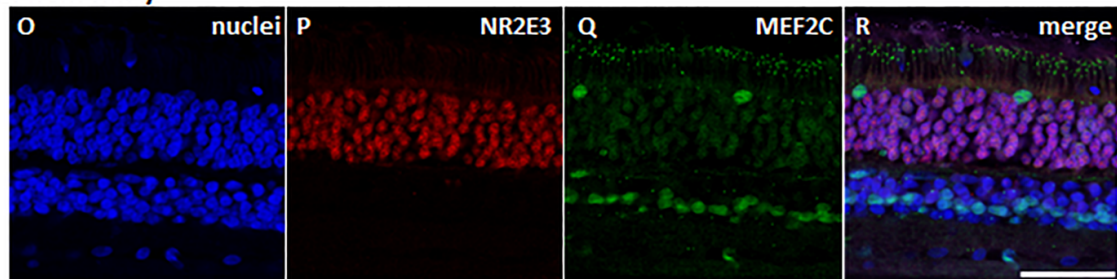

**Supplementary Figure 17: Co-expression of MEF2C with ARR3, but not NR2E3, in hPSC-derived retinal organoids and human fetal retina supports a role for MEF2C in cone development. A-J)** Confocal images of WT (A-E) or L75Pfs (F-J) d160 stage 3 (i.e., photoreceptor outer segment-containing) retinal organoids showing MEF2C (C, H) co-localization with ARR3 (D, I, merge in E and J), but not with NR2E3 in WT (B). **K-N)** Day 122 human fetal retina demonstrating localization of MEF2C (M) to the single layer of cone nuclei external to NR2E3+ developing rods (L, merge in N). **O-R)** Section from an adult monkey peripheral retina showing MEF2C (Q) localizing to two NR2E3-negative (P) nuclei in the ONL and a row of possibly Müller glia nuclei in the ONL (Q). Nuclei (blue) are shown in A, F and K. Scale bars: A-E and F-J = 10 microns. K-N and O-R = 50 microns.

## Supplementary Tables

**Supplementary Table 1: Marker genes used to call cluster identity**

| Cell type                        | Gene(s)                                                     |
|----------------------------------|-------------------------------------------------------------|
| Rod photoreceptors               | <i>NR2E3, NRL</i> (wild type cells only), <i>GNGT1, SAG</i> |
| Cone photoreceptors              | <i>PDE6H, ARR3, OPN1MW, OPN1SW, GUCA1C, GNAT2</i>           |
| Bipolar cells                    | <i>VSX1, VSX2, TMEM215, ISL1</i>                            |
| Photoreceptor/Bipolar precursors | <i>CRX, OTX2, PRDM1, VSX1</i>                               |
| Amacrine cells                   | <i>TFAP2A, GAD1, GAD2, CALB2</i>                            |
| Horizontal cells                 | <i>ONECUT1, ONECUT2, TFAP2B, PROX1</i>                      |
| Retinal ganglion cells           | <i>SLC17A6, GAP43, NEFL, NEFM</i>                           |
| Muller glia                      | <i>SOX2, SOX9, VIM, CLU, DKK3</i>                           |
| Mitotic cells                    | <i>MKI67, TOP2A, NUSAP1, CENPF</i>                          |

**Supplementary Table 2: primary antibodies**

|                      |            |             |        |
|----------------------|------------|-------------|--------|
| ARR3                 | rabbit     | LS Bio      | 1:100  |
| ARR3                 | goat       | Novus       | 1:100  |
| CRALBP               | mouse      | Abcam       | 1:250  |
| CRX                  | mouse      | Abnova      | 1:1000 |
| Ki67                 | rabbit     | Abcam       | 1:100  |
| G0 $\alpha$          | mouse      | Millipore   | 1:500  |
| ML OPSIN             | rabbit     | Millipore   | 1:500  |
| MEF2C                | rabbit     | Abnova      | 1:100  |
| hNANOG               | rabbit     | Stemgent    | 1:100  |
| NRL                  | goat       | R&D Systems | 1:300  |
| NR2E3                | mouse      | Abcam       | 1:300  |
| OCT3/4               | mouse      | Santa Cruz  | 1:100  |
| PHALLOIDIN (f-actin) |            | Invitrogen  | 1:300  |
| PKC $\alpha$         | rabbit     | Sigma       | 1:50   |
| RECOVERIN            | rabbit     | Millipore   | 1:2000 |
| RHO (4D2 clone)      | mouse      | Millipore   | 1:100  |
| SNCG                 | mouse      | Abnova      | 1:500  |
| S OPSIN              | rabbit     | Millipore   | 1:500  |
| SOX2                 | goat       | R&D Systems | 1:500  |
| VGLUT                | guinea pig | Millipore   | 1:2000 |
| VSX2                 | sheep      | Exalpha     | 1:200  |

**Supplementary Table 3: qPCR primers**

|                |                                                     |
|----------------|-----------------------------------------------------|
| $\beta$ -actin | GCGAGAAGATGACCCAGATC<br>CCAGTGGTACGGCCAGAGG         |
| CRX            | TTTGCCAAGACCCAGTACCCAGA<br>TGCATTTAGCCCTCCGGTTCTTGA |
| GNAT1          | ACGGGTACTCGCTGGAAGA<br>TCTCCGTACTGGATGTTGAGTG       |
| NRL            | CACGGTTCTCTGCATCGTTA<br>AAATTCGGGCATGACTTGAG        |
| NR2E3          | CCAGTCCCAAGTGATGCTGAG<br>GCGTTCCGCAGTGATAAACC       |
| OPN1SW         | TACGGCTTGTCACCATTCT<br>GGATTCATCTGTCATGGCCT         |
| RCVN           | CTCCTTCCAGACGATGAAAACA<br>GCCAGTGTCCCCTCAATGAA      |
| YWHAZ          | ACTTTTGGTACATTGTGGCTTCAA<br>CCGCCAGGACAAACCAGTAT    |
